# Supplementary material
Source: ML conference proceedings conference paper supplement (https://openaccess.thecvf.com/content/CVPR2023/html/Metzger_Guided_Depth_Super-Resolution_CVPR_2023_paper.html)
Supplement: Supplementary file 2 [file Metzger_Guided_Depth_Super-Resolution_CVPR_2023_supplemental.zip]

Archive with 5 entries (5 files):
- _CVPR23_Sup_Guided_Depth_Super_Resolution_by_Deep_Anisotropic_Diffusion.pdf
- diffusion_inference_video/diffusion_30_x32.mp4
- diffusion_inference_video/diffusion_31_x32.mp4
- diffusion_inference_video/diffusion_59_x32.mp4
- diffusion_inference_video/diffusion_6_x32.mp4
